# Supplementary material
Source: PubMed Central journal article supplement (PMC5513673)
Supplement: NIHMS877760-supplement-1.pdf [file NIHMS877760-supplement-1.pdf]

**Supplementary Table 1A Results of panel testing (high-penetrance genes)**

| Author                             | Year | N     | BRCA1 | BRCA2 | MLH1 | MSH2 | MSH6 | PMS2 | EPCAM | APC | MUTYH(bi) | TP53 | CDH1 | PTE<br>N | SMAD4 | STK11 | CDKN2A |
|------------------------------------|------|-------|-------|-------|------|------|------|------|-------|-----|-----------|------|------|----------|-------|-------|--------|
| Walsh <sup>1</sup>                 | 2011 | 360   | 40    | 23    |      |      | 1    |      |       |     |           | 3    |      |          |       |       |        |
| Cragun <sup>2</sup>                | 2014 | 586   |       |       | 5    | 8    | 4    | 6    |       | 6   | 4         | 1    | 2    | 1        | 4     | 1     |        |
| Kurian <sup>3</sup>                | 2014 | 198   | 57    |       | 1    |      |      |      |       |     |           |      | 1    |          |       |       | 1      |
| Laduca breast <sup>4</sup>         | 2014 | 874   | NT    | NT    |      |      |      |      |       |     |           | 4    |      | 3        |       | 1     |        |
| Laduca Colon <sup>4</sup>          | 2014 | 557   | NT    | NT    | 7    | 7    | 5    | 6    |       | 6   | 6         | 1    | 1    | 3        | 4     | 1     |        |
| Laduca Ovary <sup>4</sup>          | 2014 | 223   | NT    | NT    |      |      |      | 3    | 1     |     |           | 1    | 1    |          |       |       |        |
| Laduca "Pan-cancer" <sup>3,4</sup> | 2014 | 425   | NT    | NT    | 2    | 1    | 3    | 2    |       |     | 2         | 4    |      |          |       |       |        |
| Couch <sup>5</sup>                 | 2015 | 1784  | 155   | 49    |      |      |      |      |       |     |           | 1    |      | 1        |       |       |        |
| Lincoln <sup>6</sup>               | 2015 | 735   | 155   | 49    | 1    | 1    |      | 4    |       |     |           |      | 1    |          |       |       | 1      |
| Lincoln <sup>6</sup>               | 2015 | 327   | 70    | 58    |      | 1    |      |      |       |     |           | 2    | 3    |          |       |       |        |
| Maxwell <sup>7</sup>               | 2015 | 278   | NT    | NT    |      | 1    |      | 1    |       |     | 1         | 4    |      |          |       |       | 1      |
| Minion <sup>8</sup>                | 2015 | 911   | NT    | NT    | 2    |      | 10   | 1    |       |     |           | 3    | 1    | 2        |       |       |        |
| Tung <sup>9</sup>                  | 2015 | 1781  | 165   |       |      | 1    | 2    | 4    |       |     | 1         | 2    |      |          |       |       |        |
| Tung <sup>9</sup>                  | 2015 | 377   | NT    | NT    |      |      |      |      |       | 1   | 1         |      | 2    |          |       |       | 1      |
| Yurgelun <sup>10</sup>             | 2015 | 1260  | 6     | 9     | 31   | 40   | 26   | 12   | 3     | 5   | 3         |      |      |          |       |       | 1      |
| Li <sup>11</sup>                   | 2015 | 660   | NT    | NT    |      |      |      |      |       |     |           | 6    | 1    | 1        |       |       | 1      |
| Li <sup>11</sup>                   | 2015 | 660   | NT    | NT    |      |      |      |      |       |     |           | 6    |      |          |       |       | 1      |
| Rosenthal <sup>12</sup>            | 2015 | 76574 | 1311  | 1228  | 141  | 176  | 194  | 246  | 9     | 96  | 25        | 76   | 36   | 21       | 5     | 10    | 2      |

**Supplementary Table 2B. Results of panel testing (moderate-penetrance genes)**

| Author                             | Year | N     | ATM | BARD1 | BRIP1 | CHEK2 | MRE11 | NBN | PALB2 | RAD50 | RAD51C | RAD51D | XRCC2 | SLX4 | MUTYH<br>(mono) | % mut in mod<br>penetrance |
|------------------------------------|------|-------|-----|-------|-------|-------|-------|-----|-------|-------|--------|--------|-------|------|-----------------|----------------------------|
| Walsh <sup>1</sup>                 | 2011 | 360   |     | 1     | 4     | 5     | 1     | 1   | 2     | 1     | 2      |        |       |      |                 | 4.7%                       |
| Cragun <sup>2</sup>                | 2014 | 586   |     |       |       | 8     |       |     |       |       |        |        |       |      | 11              | 1.4%                       |
| Kurian <sup>3</sup>                | 2014 | 198   | 2   |       |       |       |       | 2   |       |       |        |        |       | 2    | 5               | 3.5%                       |
| Laduca breast <sup>4</sup>         | 2014 | 874   | 18  |       | 1     | 19    | 1     | 1   | 15    | 3     | 2      |        |       |      |                 | 6.9%                       |
| Laduca Colon <sup>4</sup>          | 2014 | 557   |     |       |       | 6     |       |     |       |       |        |        |       |      |                 | 1.1%                       |
| Laduca Ovary <sup>4</sup>          | 2014 | 223   | 2   |       | 2     | 1     | 1     | 3   | 1     |       | 1      |        |       |      |                 | 4.9%                       |
| Laduca "Pan-cancer" <sup>3,4</sup> | 2014 | 425   | 7   |       | 4     | 8     | 1     | 1   | 4     | 2     |        |        |       |      |                 | 6.4%                       |
| Couch <sup>5</sup>                 | 2015 | 1784  | 2   | 9     | 8     |       | 2     | 1   | 21    | 6     | 6      | 7      | 3     |      |                 | 3.6%                       |
| Lincoln <sup>6</sup>               | 2015 | 735   | 5   |       | 1     | 3     |       |     | 5     |       | 2      |        |       |      | 18              | 2.2%                       |
| Lincoln <sup>6</sup>               | 2015 | 327   | 3   |       |       | 2     |       |     |       |       | 1      |        |       |      | 3               | 1.8%                       |
| Maxwell <sup>7</sup>               | 2015 | 278   | 8   |       | 1     | 12    | 2     | 1   | 1     | 1     |        |        |       |      |                 | 9.4%                       |
| Minion <sup>8</sup>                | 2015 | 911   | 7   | 2     | 10    | 16    | 1     | 4   | 4     | 2     | 3      |        |       |      |                 | 5.4%                       |
| Tung <sup>9</sup>                  | 2015 | 1781  | 12  | 6     | 7     | 29    |       | 3   | 12    |       |        |        |       |      | 32              | 3.9%                       |
| Tung <sup>9</sup>                  | 2015 | 377   | 1   | 1     |       | 5     |       | 1   | 1     |       |        |        |       |      | 10              | 2.4%                       |
| Yurgelun <sup>10</sup>             | 2015 | 1260  | 8   | 1     | 2     | 5     |       | 1   | 1     |       | 1      |        |       |      | 27              | 1.5%                       |
| Li <sup>11</sup>                   | 2015 | 660   | 8   | 4     | 16    | 14    | 4     | 1   | 14    | 1     | 1      | 3      |       |      |                 | 10.0%                      |
| Li <sup>11</sup>                   | 2015 | 660   | 5   | 2     | 3     | 14    |       | 1   | 10    | 1     | 1      | 1      |       |      |                 | 5.8%                       |
| Rosenthal <sup>12</sup>            | 2015 | 76574 | 503 | 109   | 216   | 641   |       | 140 | 392   |       | 116    | 47     |       |      |                 | 2.8%                       |

## References

1. Walsh, T. et al. Mutations in 12 genes for inherited ovarian, fallopian tube, and peritoneal carcinoma identified by massively parallel sequencing. *Proc Natl Acad Sci U S A* **108**, 18032-7 (2011).
2. Cragun, D. et al. Panel-based testing for inherited colorectal cancer: a descriptive study of clinical testing performed by a US laboratory. *Clin Genet* **86**, 510-20 (2014).
3. Kurian, A.W. et al. Clinical evaluation of a multiple-gene sequencing panel for hereditary cancer risk assessment. *J Clin Oncol* **32**, 2001-9 (2014).
4. LaDuca, H. et al. Utilization of multigene panels in hereditary cancer predisposition testing: analysis of more than 2,000 patients. *Genet Med* **16**, 830-7 (2014).
5. Couch, F.J. et al. Inherited mutations in 17 breast cancer susceptibility genes among a large triple-negative breast cancer cohort unselected for family history of breast cancer. *J Clin Oncol* **33**, 304-11 (2015).
6. Lincoln, S.E. et al. A Systematic Comparison of Traditional and Multigene Panel Testing for Hereditary Breast and Ovarian Cancer Genes in More Than 1000 Patients. *J Mol Diagn* **17**, 533-44 (2015).
7. Maxwell, K.N. et al. Prevalence of mutations in a panel of breast cancer susceptibility genes in BRCA1/2-negative patients with early-onset breast cancer. *Genet Med* **17**, 630-8 (2015).
8. Minion, L.E. et al. Hereditary predisposition to ovarian cancer, looking beyond BRCA1/BRCA2. *Gynecol Oncol* **137**, 86-92 (2015).
9. Tung, N. et al. Frequency of mutations in individuals with breast cancer referred for BRCA1 and BRCA2 testing using next-generation sequencing with a 25-gene panel. *Cancer* **121**, 25-33 (2015).
10. Yurgelun, M.B. et al. Identification of a Variety of Mutations in Cancer Predisposition Genes in Patients With Suspected Lynch Syndrome. *Gastroenterology* **149**, 604-13 e20 (2015).
11. Li, J. et al. Targeted massively parallel sequencing of a panel of putative breast cancer susceptibility genes in a large cohort of multiple-case breast and ovarian cancer families. *J Med Genet* **53**, 34-42 (2016).
12. Rosenthal, E.T. et al. Outcomes of clinical testing for 50,000 patients utilizing a panel of 25 genes associated with increased risk for breast, ovarian, colorectal, endometrial, gastric, pancreatic, melanoma, and prostate cancers. *ASCO Meeting Abstracts* **33**, 1515 (2015).
