# Supplementary material
Source: PubMed Central journal article supplement (PMC5513673)
Supplement: NIHMS877760-supplement-2.pdf [file NIHMS877760-supplement-2.pdf]

Supplementary Table 2A Impact of variation in RR with age on cumulative risk estimates; ATM as an example

| Age begin (years) | Age end (years) | Population incidence | Population incidence in interval | Population cumulative risk (%) | ATM incidence (RR 2.8-Constant) | ATM incidence in interval | ATM cumulative risk |
|-------------------|-----------------|----------------------|----------------------------------|--------------------------------|---------------------------------|---------------------------|---------------------|
| 20                | 25              | 0.0000               | 0.01%                            | 0.0%                           | 0.0000                          | 0.02%                     | 0.0%                |
| 25                | 30              | 0.0001               | 0.04%                            | 0.1%                           | 0.0002                          | 0.12%                     | 0.1%                |
| 30                | 35              | 0.0003               | 0.14%                            | 0.2%                           | 0.0008                          | 0.38%                     | 0.5%                |
| 35                | 40              | 0.0006               | 0.30%                            | 0.5%                           | 0.0017                          | 0.84%                     | 1.4%                |
| 40                | 45              | 0.0012               | 0.61%                            | 1.1%                           | 0.0034                          | 1.70%                     | 3.0%                |
| 45                | 50              | 0.0019               | 0.94%                            | 2.0%                           | 0.0053                          | 2.64%                     | 5.6%                |
| 50                | 55              | 0.0022               | 1.12%                            | 3.1%                           | 0.0063                          | 3.14%                     | 8.5%                |
| 55                | 60              | 0.0027               | 1.33%                            | 4.4%                           | 0.0074                          | 3.71%                     | 11.8%               |
| 60                | 65              | 0.0034               | 1.72%                            | 6.0%                           | 0.0096                          | 4.81%                     | 16.0%               |
| 65                | 70              | 0.0042               | 2.11%                            | 8.0%                           | 0.0118                          | 5.92%                     | 20.8%               |
| 70                | 75              | 0.0044               | 2.20%                            | 10.0%                          | 0.0123                          | 6.17%                     | 25.5%               |
| 75                | 80              | 0.0045               | 2.24%                            | 12.0%                          | 0.0125                          | 6.26%                     | 30.0%               |

| Age begin (years) | Age end (years) | Population incidence | Population incidence in interval | Population cumulative risk (%) | ATM incidence (RR 5 to 50, then 2) | ATM incidence in interval | ATM cumulative risk |
|-------------------|-----------------|----------------------|----------------------------------|--------------------------------|------------------------------------|---------------------------|---------------------|
| 20                | 25              | 0.0000               | 0.01%                            | 0.0%                           | 0.0001                             | 0.04%                     | 0.0%                |
| 25                | 30              | 0.0001               | 0.04%                            | 0.1%                           | 0.0004                             | 0.22%                     | 0.3%                |
| 30                | 35              | 0.0003               | 0.14%                            | 0.2%                           | 0.0014                             | 0.68%                     | 0.9%                |
| 35                | 40              | 0.0006               | 0.30%                            | 0.5%                           | 0.0030                             | 1.51%                     | 2.4%                |
| 40                | 45              | 0.0012               | 0.61%                            | 1.1%                           | 0.0061                             | 3.04%                     | 5.3%                |
| 45                | 50              | 0.0019               | 0.94%                            | 2.0%                           | 0.0094                             | 4.72%                     | 9.7%                |
| 50                | 55              | 0.0022               | 1.12%                            | 3.1%                           | 0.0045                             | 2.24%                     | 11.7%               |
| 55                | 60              | 0.0027               | 1.33%                            | 4.4%                           | 0.0053                             | 2.65%                     | 14.0%               |
| 60                | 65              | 0.0034               | 1.72%                            | 6.0%                           | 0.0069                             | 3.44%                     | 16.9%               |
| 65                | 70              | 0.0042               | 2.11%                            | 8.0%                           | 0.0085                             | 4.23%                     | 20.4%               |
| 70                | 75              | 0.0044               | 2.20%                            | 10.0%                          | 0.0088                             | 4.41%                     | 23.8%               |
| 75                | 80              | 0.0045               | 2.24%                            | 12.0%                          | 0.0089                             | 4.47%                     | 27.1%               |

Population incidences are from SEER 2008-2012, all races. ATM RR of 2.8 from Easton et al systematic analysis.<sup>1</sup> Variable RR estimate for ATM from Thompson et al.<sup>2</sup>

Supplementary Table 2B Impact of variation in RR with age on cumulative risk estimates; *CHEK2* as an example

| Age begin (years) | Age end (years) | Population incidence | Population incidence in interval (%) | Population cumulative risk (%) | <i>CHEK2</i> incidence (RR 3.0- constant) | <i>CHEK2</i> incidence in interval (%) | <i>CHEK2</i> cumulative risk (%) |
|-------------------|-----------------|----------------------|--------------------------------------|--------------------------------|-------------------------------------------|----------------------------------------|----------------------------------|
| 20                | 25              | 0.0000               | 0.01%                                | 0.0%                           | 0.000042                                  | 0.02%                                  | 0.0%                             |
| 25                | 30              | 0.0001               | 0.04%                                | 0.1%                           | 0.000264                                  | 0.13%                                  | 0.2%                             |
| 30                | 35              | 0.0003               | 0.14%                                | 0.2%                           | 0.000816                                  | 0.41%                                  | 0.6%                             |
| 35                | 40              | 0.0006               | 0.30%                                | 0.5%                           | 0.001806                                  | 0.90%                                  | 1.5%                             |
| 40                | 45              | 0.0012               | 0.61%                                | 1.1%                           | 0.003651                                  | 1.83%                                  | 3.2%                             |
| 45                | 50              | 0.0019               | 0.94%                                | 2.0%                           | 0.005658                                  | 2.83%                                  | 5.9%                             |
| 50                | 55              | 0.0022               | 1.12%                                | 3.1%                           | 0.006729                                  | 3.36%                                  | 9.0%                             |
| 55                | 60              | 0.0027               | 1.33%                                | 4.4%                           | 0.007956                                  | 3.98%                                  | 12.6%                            |
| 60                | 65              | 0.0034               | 1.72%                                | 6.0%                           | 0.010308                                  | 5.15%                                  | 17.0%                            |
| 65                | 70              | 0.0042               | 2.11%                                | 8.0%                           | 0.012678                                  | 6.34%                                  | 22.1%                            |
| 70                | 75              | 0.0044               | 2.20%                                | 10.0%                          | 0.013218                                  | 6.61%                                  | 27.1%                            |
| 75                | 80              | 0.0045               | 2.24%                                | 12.0%                          | 0.013413                                  | 6.71%                                  | 31.8%                            |

| Age begin (years) | Age end (years) | Population incidence | Population incidence in interval | Population cumulative risk (%) | <i>CHEK2</i> incidence (declining RR) | <i>CHEK2</i> incidence in interval | <i>CHEK2</i> cumulative risk |
|-------------------|-----------------|----------------------|----------------------------------|--------------------------------|---------------------------------------|------------------------------------|------------------------------|
| 20                | 25              | 0.0000               | 0.01%                            | 0.0%                           | 0.0001                                | 0.1%                               | 0.1%                         |
| 25                | 30              | 0.0001               | 0.04%                            | 0.1%                           | 0.0007                                | 0.3%                               | 0.4%                         |
| 30                | 35              | 0.0003               | 0.14%                            | 0.2%                           | 0.0007                                | 0.4%                               | 0.8%                         |
| 35                | 40              | 0.0006               | 0.30%                            | 0.5%                           | 0.0016                                | 0.8%                               | 1.6%                         |
| 40                | 45              | 0.0012               | 0.61%                            | 1.1%                           | 0.0034                                | 1.7%                               | 3.2%                         |
| 45                | 50              | 0.0019               | 0.94%                            | 2.0%                           | 0.0053                                | 2.6%                               | 5.7%                         |
| 50                | 55              | 0.0022               | 1.12%                            | 3.1%                           | 0.0048                                | 2.4%                               | 8.0%                         |
| 55                | 60              | 0.0027               | 1.33%                            | 4.4%                           | 0.0056                                | 2.8%                               | 10.5%                        |
| 60                | 65              | 0.0034               | 1.72%                            | 6.0%                           | 0.0067                                | 3.4%                               | 13.5%                        |
| 65                | 70              | 0.0042               | 2.11%                            | 8.0%                           | 0.0082                                | 4.1%                               | 17.0%                        |
| 70                | 75              | 0.0044               | 2.20%                            | 10.0%                          | 0.0080                                | 4.0%                               | 20.2%                        |
| 75                | 80              | 0.0045               | 2.24%                            | 12.0%                          | 0.0081                                | 4.1%                               | 23.4%                        |

Population incidences are from SEER 2008-2012, all races.<sup>3</sup> *CHEK2* RR of 3.0 (for truncating mutations) from Easton et al systematic analysis.<sup>1</sup> Variable RR estimate for *CHEK2* from *CHEK2* Breast Cancer Case-Control Consortium (OR 7.91 age <30 years, 2.65 ages 30–39 years, 2.80 ages 40–49 years, 2.13 ages 50–59 years, 1.95 ages 60–69 years, and 1.82 age 70+ years).<sup>4</sup>

Supplementary Table 2C Impact of variation in RR with family history on cumulative risk estimates; *CHEK2* as an example

| Age begin (years) | Age end (years) | Population incidence in interval | <i>CHEK2</i> incidence in interval (Constant RR 3) | <i>CHEK2</i> incidence in interval (1 FDR, RR 3.12) | <i>CHEK2</i> incidence in interval (2 FDR, RR 4.17) | <i>CHEK2</i> incidence in interval ('Familial', RR 4.8) |
|-------------------|-----------------|----------------------------------|----------------------------------------------------|-----------------------------------------------------|-----------------------------------------------------|---------------------------------------------------------|
| 25                | 30              | 0.04%                            | 0.13%                                              | 0.13%                                               | 0.18%                                               | 0.20%                                                   |
| 30                | 35              | 0.14%                            | 0.41%                                              | 0.41%                                               | 0.55%                                               | 0.64%                                                   |
| 35                | 40              | 0.30%                            | 0.90%                                              | 0.93%                                               | 1.24%                                               | 1.43%                                                   |
| 40                | 45              | 0.61%                            | 1.83%                                              | 1.90%                                               | 2.54%                                               | 2.93%                                                   |
| 45                | 50              | 0.94%                            | 2.83%                                              | 2.99%                                               | 4%                                                  | 4.60%                                                   |
| 50                | 55              | 1.12%                            | 3.36%                                              | 3.54%                                               | 4.74%                                               | 5.45%                                                   |
| 55                | 60              | 1.33%                            | 3.98%                                              | 4.19%                                               | 5.60%                                               | 6.45%                                                   |
| 60                | 65              | 1.72%                            | 5.15%                                              | 5.52%                                               | 7.37%                                               | 8.49%                                                   |
| 65                | 70              | 2.11%                            | 6.34%                                              | 6.83%                                               | 9.13%                                               | 10.51%                                                  |
| 70                | 75              | 2.20%                            | 6.61%                                              | 7.18%                                               | 9.59%                                               | 11.04%                                                  |

## References

1. Easton, D.F. et al. Gene-panel sequencing and the prediction of breast-cancer risk. *N Engl J Med* **372**, 2243-57 (2015).
2. Thompson, D. et al. Cancer risks and mortality in heterozygous ATM mutation carriers. *J Natl Cancer Inst* **97**, 813-22 (2005).
3. Howlader, N. et al. SEER Cancer Statistics Review, 1975-2012, National Cancer Institute. Bethesda, MD, [http://seer.cancer.gov/csr/1975\\_2012/](http://seer.cancer.gov/csr/1975_2012/), based on November 2014 SEER data submission, posted to the SEER web site, April 2015. (2015).
4. Consortium, C.B.C.C.-C. CHEK2\*1100delC and susceptibility to breast cancer: a collaborative analysis involving 10,860 breast cancer cases and 9,065 controls from 10 studies. *Am J Hum Genet* **74**, 1175-82 (2004).
